# Supplementary material for: Impact of temperature and relative humidity on the transmission of COVID-19: a modelling study in China and the United States
Source: PubMed Central journal article supplement — BMJ Open. 2021 Feb 17;11(2):e043863. doi: 10.1136/bmjopen-2020-043863 (PMC7893211; doi:10.1136/bmjopen-2020-043863), 2021-02-17
Supplement: bmjopen-2020-043863supp001.pdf [file bmjopen-2020-043863supp001.pdf]

## Table S1. Data Summary

This table summarizes the variables used in this paper. Panel A and B summarize the data of Chinese cities and the U.S. counties.

### Panel A: Data Summary for the Chinese Cities

|                                                      | Mean   | Std    | Min     | Max     |
|------------------------------------------------------|--------|--------|---------|---------|
| <b>R</b>                                             | 1.072  | 0.707  | 0.131   | 4.609   |
| <b>6-Day Average Temperature (Celsius)</b>           | 4.468  | 6.842  | -21.100 | 19.733  |
| <b>6-Day Average Relative Humidity (%)</b>           | 77.147 | 9.589  | 48.667  | 99.833  |
| <b>GDP per Capita (RMB 10k)</b>                      | 6.800  | 3.716  | 2.159   | 18.957  |
| <b>Population Density <sup>2</sup>/k/km</b>          | 0.692  | 0.812  | 0.00800 | 6.522   |
| <b>No. Doctors (k)</b>                               | 16.020 | 11.488 | 1.972   | 68.549  |
| <b>Proxy for Inflow population from Wuhan (10 k)</b> | 5.096  | 14.833 | 0.000   | 138.154 |
| <b>Fraction over 65</b>                              | 0.121  | 0.0186 | 0.0826  | 0.152   |
| <b>Drop of BMI compared to first week 2020</b>       | -0.413 | 0.347  | -0.886  | 0.759   |

### Panel B: Data Summary for the U.S. Counties

|                                                             | Mean    | Std     | Min     | Max       |
|-------------------------------------------------------------|---------|---------|---------|-----------|
| <b>R</b>                                                    | 1.517   | 0.836   | 0.040   | 4.997     |
| <b>6-Day Average Temperature (Celsius)</b>                  | 10.738  | 6.503   | -10.192 | 28.826    |
| <b>6-Day Average Relative Humidity (%)</b>                  | 67.815  | 11.932  | 16.388  | 99.096    |
| <b>Population Density <sup>2</sup>/mile</b>                 | 374.275 | 1678.13 | 2.562   | 48229.375 |
| <b>Fraction over 65</b>                                     | 0.167   | 0.0423  | 0.0633  | 0.374     |
| <b>Gini index</b>                                           | 0.449   | 0.0309  | 0.357   | 0.597     |
| <b>GDP per capita (k Dollar)</b>                            | 45.599  | 24.417  | 13.006  | 378.762   |
| <b>Fraction below poverty level</b>                         | 15.970  | 5.604   | 4.000   | 38.100    |
| <b>Personal income (Dollar)</b>                             | 46923.2 | 14586.7 | 26407   | 251728    |
| <b>Fraction of not in labor force, 16 years or over</b>     | 38.842  | 6.737   | 19.600  | 62.000    |
| <b>Fraction of total household more than \$200,000</b>      | 3.564   | 2.948   | 0.400   | 23.100    |
| <b>Fraction of food stamp/SNAP benefits</b>                 | 13.854  | 5.355   | 1.400   | 38.800    |
| <b>No. ICU beds per 10000 capita</b>                        | 2.182   | 1.945   | 0.000   | 17.357    |
| <b>Fraction of maximum moving distance over normal time</b> | 25.918  | 25.918  | 0.000   | 478.000   |
| <b>Home-stay minutes</b>                                    | 749.064 | 145.883 | 206.585 | 1275.341  |
