# Supplementary material for: Impact of temperature and relative humidity on the transmission of COVID-19: a modelling study in China and the United States
Source: PubMed Central journal article supplement — BMJ Open. 2021 Feb 17;11(2):e043863. doi: 10.1136/bmjopen-2020-043863 (PMC7893211; doi:10.1136/bmjopen-2020-043863), 2021-02-17
Supplement: bmjopen-2020-043863supp002.pdf [file bmjopen-2020-043863supp002.pdf]

**Table S2: Pairwise Correlation Analysis for Chinese Cities**

Pairwise correlation coefficients are obtained by averaging all correlation coefficients from each time step in the

|                              | Temperature | Relative Humidity | Population Density | Percentage over 65 | GDP per capita | No. of doctors | Drop of BMI | Inflow |
|------------------------------|-------------|-------------------|--------------------|--------------------|----------------|----------------|-------------|--------|
| Temperature                  | 1.00        | 0.32              | 0.33               | -0.37              | 0.33           | 0.13           | -0.21       |        |
| Relative Humidity            | 0.32        | 1.00              | -0.08              | 0.01               | -0.16          | -0.09          | 0.29        |        |
| Population Density           | 0.33        | -0.08             | 1.00               | -0.27              | 0.57           | 0.29           | -0.40       |        |
| Percentage over 65           | -0.37       | 0.01              | -0.27              | 1.00               | -0.20          | 0.13           | 0.25        |        |
| GDP per capita               | 0.33        | -0.16             | 0.57               | -0.20              | 1.00           | 0.45           | -0.76       |        |
| No. of doctors               | 0.13        | -0.09             | 0.29               | 0.13               | 0.45           | 1.00           | -0.39       |        |
| Drop of BMI                  | -0.21       | 0.29              | -0.40              | 0.25               | -0.76          | -0.39          | 1.00        |        |
| Inflow population from Wuhan | 0.04        | 0.09              | -0.09              | 0.06               | -0.14          | -0.12          | 0.04        |        |
| Latitude                     | -0.92       | -0.44             | -0.27              | 0.45               | -0.25          | -0.06          | 0.12        |        |
| Longitude                    | -0.57       | -0.32             | -0.03              | 0.13               | 0.05           | -0.22          | -0.14       |        |
