# Supplementary material for: Impact of temperature and relative humidity on the transmission of COVID-19: a modelling study in China and the United States
Source: PubMed Central journal article supplement — BMJ Open. 2021 Feb 17;11(2):e043863. doi: 10.1136/bmjopen-2020-043863 (PMC7893211; doi:10.1136/bmjopen-2020-043863), 2021-02-17
Supplement: bmjopen-2020-043863supp003.pdf [file bmjopen-2020-043863supp003.pdf]

**Table S3: Pairwise Correlation Analysis for the U.S. Counties**

Pairwise correlation coefficients are obtained by averaging all correlation coefficients from each time step in the

|                            | Temperature | Relative Humidity | Population Density | Percentage over 65 | Gini  | Se-factor | No. of ICU beds per capita | M50_index |
|----------------------------|-------------|-------------------|--------------------|--------------------|-------|-----------|----------------------------|-----------|
| Temperature                | 1.00        | 0.17              | 0.01               | -0.05              | 0.34  | 0.36      | 0.11                       | 0.34      |
| Relative Humidity          | 0.17        | 1.00              | -0.06              | 0.08               | 0.05  | 0.02      | 0.00                       | 0.07      |
| Population Density         | 0.01        | -0.06             | 1.00               | -0.11              | 0.23  | 0.07      | 0.07                       | -0.19     |
| Percentage over 65         | -0.05       | 0.08              | -0.11              | 1.00               | 0.02  | 0.14      | -0.04                      | -0.03     |
| Gini                       | 0.34        | 0.05              | 0.23               | 0.02               | 1.00  | 0.53      | 0.37                       | 0.15      |
| Socio-economic factor      | 0.36        | 0.02              | 0.07               | 0.14               | 0.53  | 1.00      | 0.21                       | 0.32      |
| No. of ICU beds per capita | 0.11        | 0.00              | 0.07               | -0.04              | 0.37  | 0.21      | 1.00                       | 0.18      |
| M50_index                  | 0.34        | 0.07              | -0.19              | -0.03              | 0.15  | 0.32      | 0.18                       | 1.00      |
| Home-stay minutes          | 0.00        | 0.10              | 0.11               | -0.18              | -0.17 | -0.41     | -0.10                      | -0.37     |
| Latitude                   | -0.90       | -0.20             | 0.01               | 0.05               | -0.35 | -0.34     | -0.11                      | -0.37     |
| Longitude                  | 0.04        | 0.12              | 0.10               | 0.13               | 0.07  | 0.00      | 0.10                       | -0.08     |
