# Supplementary material for: Impact of temperature and relative humidity on the transmission of COVID-19: a modelling study in China and the United States
Source: PubMed Central journal article supplement — BMJ Open. 2021 Feb 17;11(2):e043863. doi: 10.1136/bmjopen-2020-043863 (PMC7893211; doi:10.1136/bmjopen-2020-043863), 2021-02-17
Supplement: bmjopen-2020-043863supp004.pdf [file bmjopen-2020-043863supp004.pdf]

**Table S4: Unit Root Test for R, Temperature and Relative Humidity**

Panel A and B show the results of Handri LM test [8] with null hypotheses of non-unit-roots, for Chinese cities and the U.S. counties, respectively.

| <b>Panel A: Test Results for Chinese Cities</b> |                |                    |                          |
|-------------------------------------------------|----------------|--------------------|--------------------------|
|                                                 | <b>R value</b> | <b>Temperature</b> | <b>Relative Humidity</b> |
| <b>z-stat</b>                                   | 18.7472        | 51.1532            | 42.6092                  |
| <b>p-value</b>                                  | 0.0000         | 0.0000             | 0.0000                   |

  

| <b>Panel B: Test Results for the U.S. Counties</b> |                |                    |                          |
|----------------------------------------------------|----------------|--------------------|--------------------------|
|                                                    | <b>R value</b> | <b>Temperature</b> | <b>Relative Humidity</b> |
| <b>z-stat</b>                                      | 43.0116        | 61.0510            | 76.8665                  |
| <b>p-value</b>                                     | 0.0000         | 0.0000             | 0.0000                   |
