# Supplementary material for: Impact of temperature and relative humidity on the transmission of COVID-19: a modelling study in China and the United States
Source: PubMed Central journal article supplement — BMJ Open. 2021 Feb 17;11(2):e043863. doi: 10.1136/bmjopen-2020-043863 (PMC7893211; doi:10.1136/bmjopen-2020-043863), 2021-02-17
Supplement: bmjopen-2020-043863supp005.pdf [file bmjopen-2020-043863supp005.pdf]

### Table S5: Coefficients of temperature and relative humidity in first step of Fama-Macbeth Regression

Panel A and B show regression coefficients of temperature and relative humidity in the first step of Fama-Macbeth regression, for Chinese cities and the U.S. counties, respectively.

| <b>Panel A: Regression Coefficients for Chinese Cities</b> |                                   |                                         |
|------------------------------------------------------------|-----------------------------------|-----------------------------------------|
| <b>Date</b>                                                | <b>Coefficient of Temperature</b> | <b>Coefficient of Relative Humidity</b> |
| <b>Jan, 19</b>                                             | -0.0373                           | -0.0109                                 |
| <b>Jan, 20</b>                                             | -0.0064                           | 0.0009                                  |
| <b>Jan, 21</b>                                             | -0.0127                           | -0.0093                                 |
| <b>Jan, 22</b>                                             | -0.0309                           | -0.0121                                 |
| <b>Jan, 23</b>                                             | -0.0427                           | -0.0066                                 |
| <b>Jan, 24</b>                                             | -0.0249                           | 0.0010                                  |
| <b>Jan, 25</b>                                             | -0.0238                           | -0.0062                                 |
| <b>Jan, 26</b>                                             | -0.0506                           | -0.0174                                 |
| <b>Jan, 27</b>                                             | -0.0526                           | -0.0159                                 |
| <b>Jan, 28</b>                                             | -0.0196                           | -0.0063                                 |
| <b>Jan, 29</b>                                             | -0.0340                           | -0.0101                                 |
| <b>Jan, 30</b>                                             | -0.0305                           | -0.0096                                 |
| <b>Jan, 31</b>                                             | -0.0391                           | -0.0087                                 |
| <b>Feb, 1</b>                                              | -0.0388                           | -0.0102                                 |
| <b>Feb, 2</b>                                              | -0.0248                           | -0.0097                                 |
| <b>Feb, 3</b>                                              | -0.0108                           | -0.0022                                 |
| <b>Feb, 4</b>                                              | -0.0091                           | 0.0020                                  |
| <b>Feb, 5</b>                                              | 0.0039                            | 0.0040                                  |
| <b>Feb, 6</b>                                              | -0.0061                           | -0.0037                                 |
| <b>Feb, 7</b>                                              | -0.0034                           | 0.0006                                  |
| <b>Feb, 8</b>                                              | 0.0103                            | -0.0030                                 |
| <b>Feb, 9</b>                                              | -0.0077                           | -0.0067                                 |
| <b>Feb, 10</b>                                             | -0.0150                           | 0.0052                                  |

**Panel B: Regression Coefficients for U.S. Counties**

| <b>Date</b>    | <b>Coefficient of Temperature</b> | <b>Coefficient of Relative Humidity</b> |
|----------------|-----------------------------------|-----------------------------------------|
| <b>Mar, 15</b> | -0.0402                           | -0.0190                                 |
| <b>Mar, 16</b> | -0.0309                           | -0.0192                                 |
| <b>Mar, 17</b> | -0.0052                           | -0.0129                                 |
| <b>Mar, 18</b> | -0.0192                           | -0.0146                                 |
| <b>Mar, 19</b> | -0.0412                           | -0.0237                                 |
| <b>Mar, 20</b> | 0.0224                            | -0.0114                                 |
| <b>Mar, 21</b> | -0.0112                           | -0.0158                                 |
| <b>Mar, 22</b> | -0.0138                           | -0.0169                                 |
| <b>Mar, 23</b> | -0.0021                           | -0.0195                                 |
| <b>Mar, 24</b> | -0.0107                           | -0.0166                                 |
| <b>Mar, 25</b> | -0.0184                           | -0.0073                                 |
| <b>Mar, 26</b> | -0.0231                           | -0.0095                                 |
| <b>Mar, 27</b> | -0.0241                           | -0.0010                                 |
| <b>Mar, 28</b> | -0.0468                           | 0.0013                                  |
| <b>Mar, 29</b> | -0.0314                           | 0.0007                                  |
| <b>Mar, 30</b> | -0.0533                           | 0.0076                                  |
| <b>Mar, 31</b> | -0.0403                           | 0.0071                                  |
| <b>Apr, 1</b>  | -0.0386                           | -0.0003                                 |
| <b>Apr, 2</b>  | -0.0234                           | -0.0017                                 |
| <b>Apr, 3</b>  | 0.0029                            | -0.0024                                 |
| <b>Apr, 4</b>  | 0.0037                            | -0.0031                                 |
| <b>Apr, 5</b>  | -0.0177                           | -0.0010                                 |
| <b>Apr, 6</b>  | -0.0057                           | -0.0040                                 |
| <b>Apr, 7</b>  | -0.0041                           | -0.0028                                 |
| <b>Apr, 8</b>  | -0.0116                           | -0.0029                                 |
| <b>Apr, 9</b>  | -0.0138                           | -0.0032                                 |
| <b>Apr, 10</b> | -0.0123                           | -0.0032                                 |
| <b>Apr, 11</b> | -0.0211                           | -0.0021                                 |

---

| <b>Date</b>    | <b>Coefficient of Temperature</b> | <b>Coefficient of Relative Humidity</b> |
|----------------|-----------------------------------|-----------------------------------------|
| <b>Apr, 12</b> | -0.0297                           | -0.0002                                 |
| <b>Apr, 13</b> | -0.0244                           | -0.0008                                 |
| <b>Apr, 14</b> | -0.0310                           | -0.0016                                 |
| <b>Apr, 15</b> | -0.0295                           | -0.0012                                 |
| <b>Apr, 16</b> | -0.0271                           | -0.0010                                 |
| <b>Apr, 17</b> | -0.0297                           | 0.0022                                  |
| <b>Apr, 18</b> | -0.0245                           | 0.0027                                  |
| <b>Apr, 19</b> | -0.0196                           | 0.0020                                  |
| <b>Apr, 20</b> | -0.0110                           | -0.0012                                 |
| <b>Apr, 21</b> | 0.0068                            | -0.0002                                 |
| <b>Apr, 22</b> | 0.0126                            | -0.0015                                 |
| <b>Apr, 23</b> | 0.0061                            | -0.0033                                 |
| <b>Apr, 24</b> | 0.0216                            | -0.0028                                 |
| <b>Apr, 25</b> | 0.0186                            | -0.0030                                 |

---
