# Supplementary material for: Impact of temperature and relative humidity on the transmission of COVID-19: a modelling study in China and the United States
Source: PubMed Central journal article supplement — BMJ Open. 2021 Feb 17;11(2):e043863. doi: 10.1136/bmjopen-2020-043863 (PMC7893211; doi:10.1136/bmjopen-2020-043863), 2021-02-17
Supplement: bmjopen-2020-043863supp006.pdf [file bmjopen-2020-043863supp006.pdf]

**Table S6: Fama-Macbeth Regression for Chinese Cities except Wuhan**

Daily  $R$  values from January 19 to February 10 and the average temperature and relative humidity over 6 days up to and including the day when  $R$  value is measured, are used in the regression for 99 Chinese cities (without Wuhan). The regression is estimated by the Fama-MacBeth approach.

|                           | <b>Overall</b>     | <b>Before Lockdown (Jan 24)</b> | <b>After Lockdown (Jan 24)</b> |
|---------------------------|--------------------|---------------------------------|--------------------------------|
| R2                        | 0.3029             | 0.1915                          | 0.3339                         |
| <b>Temperature</b>        |                    |                                 |                                |
| coef                      | -0.0223            | -0.0287                         | -0.0205                        |
| 95%CI                     | [-0.0358, -0.0088] | [-0.0406, -0.0168]              | [-0.0369, -0.0041]             |
| std.err                   | 0.0065             | 0.0043                          | 0.0078                         |
| t-stat                    | -3.44              | -6.69                           | -2.64                          |
| p-value                   | 0.002              | 0.003                           | 0.017                          |
| <b>Relative Humidity</b>  |                    |                                 |                                |
| coef                      | -0.0060            | -0.0071                         | -0.0056                        |
| 95%CI                     | [-0.0100, -0.0019] | [-0.0105, -0.0038]              | [-0.0108, -0.0005]             |
| std.err                   | 0.0019             | 0.0012                          | 0.0024                         |
| t-stat                    | -3.07              | -5.86                           | -2.32                          |
| p-value                   | 0.006              | 0.004                           | 0.033                          |
| <b>Population Density</b> |                    |                                 |                                |
| coef                      | 0.0262             | 0.1198                          | 0.0002                         |
| 95%CI                     | [-0.0290, 0.0814]  | [0.0564, 0.1832]                | [-0.0352, 0.0356]              |
| std.err                   | 0.0266             | 0.0228                          | 0.0168                         |
| t-stat                    | 0.98               | 5.25                            | 0.01                           |
| p-value                   | 0.336              | 0.006                           | 0.991                          |
| <b>Percentage over 65</b> |                    |                                 |                                |
| coef                      | 0.1316             | 0.3849                          | 0.0612                         |
| 95%CI                     | [-1.7302, 1.9933]  | [-1.0386, 1.8084]               | [-2.3111, 2.4335]              |
| std.err                   | 0.8977             | 0.5127                          | 1.1244                         |
| t-stat                    | 0.15               | 0.75                            | 0.05                           |

|                                     | Overall            | Before Lockdown (Jan 24) | After Lockdown (Jan 24) |
|-------------------------------------|--------------------|--------------------------|-------------------------|
| p-value                             | 0.885              | 0.495                    | 0.957                   |
| <b>GDP per capita</b>               |                    |                          |                         |
| coef                                | 0.0048             | -0.0110                  | 0.0092                  |
| 95%CI                               | [-0.0148, 0.0244]  | [-0.0252, 0.0033]        | [-0.0114, 0.0298]       |
| std.err                             | 0.0095             | 0.0051                   | 0.0098                  |
| t-stat                              | 0.51               | -2.13                    | 0.94                    |
| p-value                             | 0.616              | 0.100                    | 0.360                   |
| <b>No. of doctors</b>               |                    |                          |                         |
| coef                                | -0.0057            | -0.0109                  | -0.0043                 |
| 95%CI                               | [-0.0089, -0.0025] | [-0.0162, -0.0056]       | [-0.0064, -0.0022]      |
| std.err                             | 0.0015             | 0.0019                   | 0.0010                  |
| t-stat                              | -3.73              | -5.69                    | -4.35                   |
| p-value                             | 0.001              | 0.005                    | 0.0004                  |
| <b>Drop of BMI</b>                  |                    |                          |                         |
| coef                                | 0.3135             | -0.4107                  | 0.5146                  |
| 95%CI                               | [-0.3290, -0.9559] | [-0.6870, -0.1344]       | [-0.0995, 1.1287]       |
| std.err                             | 0.3098             | 0.0995                   | 0.2911                  |
| t-stat                              | 1.01               | -4.13                    | 1.77                    |
| p-value                             | 0.323              | 0.015                    | 0.095                   |
| <b>Inflow population from Wuhan</b> |                    |                          |                         |
| coef                                | -0.0052            | -0.0006                  | -0.0065                 |
| 95%CI                               | [-0.0106, 0.0002]  | [-0.0011, -0.0002]       | [-0.0128, -0.0002]      |
| std.err                             | 0.0026             | 0.0002                   | 0.0030                  |
| t-stat                              | -1.99              | -3.93                    | -2.17                   |
| p-value                             | 0.059              | 0.017                    | 0.044                   |
| <b>Latitude</b>                     |                    |                          |                         |
| coef                                | 0.0040             | 0.0082                   | 0.0029                  |
| 95%CI                               | [-0.0149, 0.0230]  | [-0.0132, 0.0296]        | [-0.0213, 0.0271]       |
| std.err                             | 0.0091             | 0.0077                   | 0.0115                  |

|                  | <b>Overall</b>     | <b>Before Lockdown (Jan 24)</b> | <b>After Lockdown (Jan 24)</b> |
|------------------|--------------------|---------------------------------|--------------------------------|
| t-stat           | 0.44               | 1.06                            | 0.25                           |
| p-value          | 0.663              | 0.347                           | 0.804                          |
| <b>Longitude</b> |                    |                                 |                                |
| coef             | -0.0110            | -0.0293                         | -0.0059                        |
| 95%CI            | [-0.0209, -0.0010] | [-0.0579, -0.0008]              | [-0.0134, 0.0017]              |
| std.err          | 0.0048             | 0.0103                          | 0.0036                         |
| t-stat           | -2.29              | -2.85                           | -1.64                          |
| p-value          | 0.032              | 0.046                           | 0.119                          |
| <b>const</b>     |                    |                                 |                                |
| coef             | 1.0925             | 2.1209                          | 0.8069                         |
| 95%CI            | [0.5059, 1.6792]   | [1.5697, 2.6721]                | [0.5327, 1.0810]               |
| std.err          | 0.2829             | 0.1985                          | 0.1299                         |
| t-stat           | 3.86               | 10.68                           | 6.21                           |
| p-value          | 0.001              | 0                               | 0                              |
