# Supplementary material for: Impact of temperature and relative humidity on the transmission of COVID-19: a modelling study in China and the United States
Source: PubMed Central journal article supplement — BMJ Open. 2021 Feb 17;11(2):e043863. doi: 10.1136/bmjopen-2020-043863 (PMC7893211; doi:10.1136/bmjopen-2020-043863), 2021-02-17
Supplement: bmjopen-2020-043863supp007.pdf [file bmjopen-2020-043863supp007.pdf]

### Table S7: Relationship between Temperature, Relative Humidity, and $R$ Values: Check with the Serial Interval of Mean 7.5 Days and Standard Deviation 3.4 day (2020)[2] for Chinese Cities

This table utilizes the estimated serial interval in a previous paper (mean 7.5 days, std 3.4 days)[2] to construct  $R$  values for China. The table reports the coefficients of the effective reproductive number,  $R$  values, on an intercept, temperature, relative humidity and control variables in the Fama-MacBeth regressions.

|                           | Overall           | Before Lockdown (Jan 24) | After Lockdown (Jan 24) |
|---------------------------|-------------------|--------------------------|-------------------------|
| R2                        | 0.2843            | 0.2009                   | 0.3074                  |
| <b>Temperature</b>        |                   |                          |                         |
| coef                      | -0.0267           | -0.0430                  | -0.0222                 |
| 95%CI                     | [-0.0486,-0.0048] | [-0.0694,-0.0165]        | [-0.0456,0.0012]        |
| std.err                   | 0.0106            | 0.0095                   | 0.0111                  |
| t-stat                    | -2.53             | -4.52                    | -2.00                   |
| p-value                   | 0.019             | 0.011                    | 0.061                   |
| <b>Relative Humidity</b>  |                   |                          |                         |
| coef                      | -0.0076           | -0.0104                  | -0.0068                 |
| 95%CI                     | [-0.0121,-0.0031] | [-0.0166,-0.0041]        | [-0.0121,-0.0015]       |
| std.err                   | 0.0022            | 0.0023                   | 0.0025                  |
| t-stat                    | -3.47             | -4.59                    | -2.69                   |
| p-value                   | 0.002             | 0.010                    | 0.015                   |
| <b>Population Density</b> |                   |                          |                         |
| coef                      | 0.0223            | 0.1673                   | -0.0180                 |
| 95%CI                     | [-0.0672,0.1118]  | [0.0350,0.2996]          | [-0.0825,0.0465]        |
| std.err                   | 0.0432            | 0.0477                   | 0.0306                  |
| t-stat                    | 0.52              | 3.51                     | -0.59                   |
| p-value                   | 0.611             | 0.025                    | 0.563                   |
| <b>Percentage over 65</b> |                   |                          |                         |
| coef                      | -0.7581           | 0.3976                   | -1.0791                 |

|                                     | <b>Overall</b>    | <b>Before Lockdown (Jan 24)</b> | <b>After Lockdown (Jan 24)</b> |
|-------------------------------------|-------------------|---------------------------------|--------------------------------|
| 95%CI                               | [-3.7515,2.2353]  | [-2.9474,3.7426]                | [-4.8094,2.6511]               |
| std.err                             | 1.4434            | 1.2048                          | 1.7680                         |
| t-stat                              | -0.53             | 0.33                            | -0.61                          |
| p-value                             | 0.605             | 0.758                           | 0.550                          |
| <b>GDP per capita</b>               |                   |                                 |                                |
| coef                                | 0.0058            | -0.0291                         | 0.0154                         |
| 95%CI                               | [-0.0246,0.0361]  | [-0.0390,-0.0193]               | [-0.0124,0.0433]               |
| std.err                             | 0.0147            | 0.0035                          | 0.0132                         |
| t-stat                              | 0.39              | -8.21                           | 1.17                           |
| p-value                             | 0.698             | 0.001                           | 0.258                          |
| <b>No. of doctors</b>               |                   |                                 |                                |
| coef                                | -0.0065           | -0.0135                         | -0.0045                        |
| 95%CI                               | [-0.0107,-0.0023] | [-0.0205,-0.0065]               | [-0.0067,-0.0024]              |
| std.err                             | 0.0020            | 0.0025                          | 0.0010                         |
| t-stat                              | -3.22             | -5.35                           | -4.47                          |
| p-value                             | 0.004             | 0.006                           | 0.0003                         |
| <b>Drop of BMI</b>                  |                   |                                 |                                |
| coef                                | 0.3287            | -0.7465                         | 0.6274                         |
| 95%CI                               | [-0.5135,1.1709]  | [-1.3448,-0.1483]               | [-0.1037,1.3585]               |
| std.err                             | 0.4061            | 0.2155                          | 0.3465                         |
| t-stat                              | 0.81              | -3.46                           | 1.81                           |
| p-value                             | 0.427             | 0.026                           | 0.088                          |
| <b>Inflow population from Wuhan</b> |                   |                                 |                                |
| coef                                | -0.0053           | -0.0003                         | -0.0067                        |
| 95%CI                               | [-0.0114,0.0008]  | [-0.0009,0.0003]                | [-0.0139,0.0006]               |
| std.err                             | 0.0029            | 0.0002                          | 0.0034                         |
| t-stat                              | -1.79             | -1.34                           | -1.94                          |
| p-value                             | 0.087             | 0.250                           | 0.069                          |
| <b>Latitude</b>                     |                   |                                 |                                |

|                  | <b>Overall</b>   | <b>Before Lockdown (Jan 24)</b> | <b>After Lockdown (Jan 24)</b> |
|------------------|------------------|---------------------------------|--------------------------------|
| coef             | 0.0026           | 0.0045                          | 0.0021                         |
| 95%CI            | [-0.0245,0.0298] | [-0.0518,0.0608]                | [-0.0302,0.0344]               |
| std.err          | 0.0131           | 0.0203                          | 0.0153                         |
| t-stat           | 0.20             | 0.22                            | 0.14                           |
| p-value          | 0.843            | 0.835                           | 0.893                          |
| <b>Longitude</b> |                  |                                 |                                |
| coef             | -0.0103          | -0.0305                         | -0.0046                        |
| 95%CI            | [-0.0233,0.0027] | [-0.0796,0.0186]                | [-0.0160,0.0067]               |
| std.err          | 0.0063           | 0.0177                          | 0.0054                         |
| t-stat           | -1.64            | -1.72                           | -0.86                          |
| p-value          | 0.116            | 0.16                            | 0.399                          |
| <b>const</b>     |                  |                                 |                                |
| coef             | 1.0616           | 2.2036                          | 0.7444                         |
| 95%CI            | [0.4353,1.6879]  | [1.431,2.9762]                  | [0.5063,0.9826]                |
| std.err          | 0.3020           | 0.2783                          | 0.1129                         |
| t-stat           | 3.52             | 7.92                            | 6.60                           |
| p-value          | 0.002            | 0.001                           | 0                              |
