# Supplementary material for: Impact of temperature and relative humidity on the transmission of COVID-19: a modelling study in China and the United States
Source: PubMed Central journal article supplement — BMJ Open. 2021 Feb 17;11(2):e043863. doi: 10.1136/bmjopen-2020-043863 (PMC7893211; doi:10.1136/bmjopen-2020-043863), 2021-02-17
Supplement: bmjopen-2020-043863supp008.pdf [file bmjopen-2020-043863supp008.pdf]

**Table S8: Relationship between Temperature, Relative Humidity, and  $R$  Value: F Check with the Serial Interval of Mean 7.5 Days and Standard Deviation 3.4 day (2020)[2] for the U.S. Counties**

This table utilizes the estimated serial interval in a previous paper (mean 7.5 days, std 3.4 days)[2] to construct  $R$  values for the U.S. counties. The table reports the coefficients of the effective reproductive number,  $R$  value, on an intercept, temperature, relative humidity and control variables in the Fama-MacBeth regressions.

|                           | Overall            | Before Lockdown (April 7) | After Lockdown (April 7) |
|---------------------------|--------------------|---------------------------|--------------------------|
| R2                        | 0.1170             | 0.1508                    | 0.0760                   |
| <b>Temperature</b>        |                    |                           |                          |
| coef                      | -0.0199            | -0.0271                   | -0.0113                  |
| 95%CI                     | [-0.0330,-0.0069]  | [-0.0456,-0.0086]         | [-0.0296,0.0071]         |
| std.err                   | 0.0065             | 0.0089                    | 0.0087                   |
| t-stat                    | -3.08              | -3.03                     | -1.29                    |
| p-value                   | 0.004              | 0.006                     | 0.214                    |
| <b>Relative Humidity</b>  |                    |                           |                          |
| coef                      | -0.0052            | -0.0086                   | -0.0011                  |
| 95%CI                     | [-0.0114,0.0011]   | [-0.0169,-0.0003]         | [-0.0030,0.0008]         |
| std.err                   | 0.0031             | 0.0040                    | 0.0009                   |
| t-stat                    | -1.68              | -2.14                     | -1.20                    |
| p-value                   | 0.101              | 0.044                     | 0.244                    |
| <b>Population Density</b> |                    |                           |                          |
| coef                      | 0.00002            | 3.00E-05                  | 5.07E-08                 |
| 95%CI                     | [-0.00003,0.00006] | [-0.0001,0.0001]          | [-2.20e-6,2.30e-6]       |
| std.err                   | 0.00002            | 4.00E-05                  | 1.07E-06                 |
| t-stat                    | 0.73               | 0.71                      | 0.05                     |
| p-value                   | 0.469              | 0.483                     | 0.963                    |
| <b>Percentage over 65</b> |                    |                           |                          |
| coef                      | -0.9733            | -1.2685                   | -0.6159                  |

|                                                             | <b>Overall</b>    | <b>Before Lockdown (April 7)</b> | <b>After Lockdown (April 7)</b> |
|-------------------------------------------------------------|-------------------|----------------------------------|---------------------------------|
| 95%CI                                                       | [-1.4465,-0.5000] | [-1.9245,-0.6124]                | [-1.0408,-0.1911]               |
| std.err                                                     | 0.2343            | 0.3163                           | 0.2022                          |
| t-stat                                                      | -4.15             | -4.01                            | -3.05                           |
| p-value                                                     | 0.0002            | 0.001                            | 0.007                           |
| <b>Gini</b>                                                 |                   |                                  |                                 |
| coef                                                        | -1.9913           | -2.4119                          | -1.4822                         |
| 95%CI                                                       | [-3.6305,-0.3521] | [-4.9880,0.1643]                 | [-2.2360,-0.7285]               |
| std.err                                                     | 0.8117            | 1.2422                           | 0.3588                          |
| t-stat                                                      | -2.45             | -1.94                            | -4.13                           |
| p-value                                                     | 0.018             | 0.065                            | 0.001                           |
| <b>Socio-economic factor</b>                                |                   |                                  |                                 |
| coef                                                        | 0.0906            | 0.1424                           | 0.0279                          |
| 95%CI                                                       | [0.0166,0.1646]   | [0.0627,0.2222]                  | [-0.0112,0.0670]                |
| std.err                                                     | 0.0366            | 0.0385                           | 0.0186                          |
| t-stat                                                      | 2.47              | 3.70                             | 1.50                            |
| p-value                                                     | 0.018             | 0.001                            | 0.152                           |
| <b>No. of ICU beds per capita</b>                           |                   |                                  |                                 |
| coef                                                        | -0.0113           | -0.0127                          | -0.0096                         |
| 95%CI                                                       | [-0.0263,0.0038]  | [-0.0367,0.0113]                 | [-0.0147,-0.0044]               |
| std.err                                                     | 0.0075            | 0.0116                           | 0.0025                          |
| t-stat                                                      | -1.51             | -1.10                            | -3.91                           |
| p-value                                                     | 0.138             | 0.285                            | 0.001                           |
| <b>Fraction of maximum moving distance over normal time</b> |                   |                                  |                                 |
| coef                                                        | 0.0036            | 0.0019                           | 0.0056                          |
| 95%CI                                                       | [0.0006,0.0066]   | [-0.0023,0.0061]                 | [0.0043,0.0070]                 |
| std.err                                                     | 0.0015            | 0.0020                           | 0.0007                          |
| t-stat                                                      | 2.44              | 0.94                             | 8.67                            |
| p-value                                                     | 0.019             | 0.356                            | 0                               |
| <b>Home-stay minutes</b>                                    |                   |                                  |                                 |

|                  | <b>Overall</b>   | <b>Before Lockdown (April 7)</b> | <b>After Lockdown (April 7)</b> |
|------------------|------------------|----------------------------------|---------------------------------|
| coef             | 0.0003           | 0.0007                           | -0.0003                         |
| 95%CI            | [-0.0003,0.0008] | [0.0003,0.0011]                  | [-0.0005,-2e-05]                |
| std.err          | 0.0003           | 0.0002                           | 0.0001                          |
| t-stat           | 1.00             | 3.28                             | -2.24                           |
| p-value          | 0.321            | 0.003                            | 0.038                           |
| <b>Latitude</b>  |                  |                                  |                                 |
| coef             | -0.0259          | -0.0514                          | 0.0049                          |
| 95%CI            | [-0.0551,0.0032] | [-0.0825,-0.0203]                | [-0.0179,0.0277]                |
| std.err          | 0.0144           | 0.0150                           | 0.0109                          |
| t-stat           | -1.80            | -3.43                            | 0.45                            |
| p-value          | 0.080            | 0.002                            | 0.657                           |
| <b>Longitude</b> |                  |                                  |                                 |
| coef             | 0.0070           | 0.0110                           | 0.0021                          |
| 95%CI            | [0.0019,0.0120]  | [0.0059,0.0161]                  | [0.0003,0.0039]                 |
| std.err          | 0.0025           | 0.0025                           | 0.0009                          |
| t-stat           | 2.79             | 4.45                             | 2.50                            |
| p-value          | 0.008            | 0.0002                           | 0.022                           |
| <b>const</b>     |                  |                                  |                                 |
| coef             | 1.7601           | 2.2325                           | 1.1882                          |
| 95%CI            | [1.1636,2.3566]  | [1.6514,2.8137]                  | [1.1588,1.2177]                 |
| std.err          | 0.2954           | 0.2802                           | 0.0140                          |
| t-stat           | 5.96             | 7.97                             | 84.82                           |
| p-value          | 0                | 0                                | 0                               |
