# Supplementary material for: Impact of temperature and relative humidity on the transmission of COVID-19: a modelling study in China and the United States
Source: PubMed Central journal article supplement — BMJ Open. 2021 Feb 17;11(2):e043863. doi: 10.1136/bmjopen-2020-043863 (PMC7893211; doi:10.1136/bmjopen-2020-043863), 2021-02-17
Supplement: bmjopen-2020-043863supp009.pdf [file bmjopen-2020-043863supp009.pdf]

**Table S9: Relationship between Temperature, Relative Humidity, and R Value: F Check with a social distancing dummy variable for the U.S. Counties.**

U.S. states lifted stay-at-home orders, namely a series of social distancing policies, at different times. This table shows the regression results for the U.S. Counties with an additional dummy explanatory variable recording whether the state where a county is located already lifted a stay-at-home order. The regression is estimated by the Fama-MacBeth approach.

|                           | <b>Overall</b>    | <b>Before Lockdown (April 7)</b> | <b>After Lockdown (April 7)</b> |
|---------------------------|-------------------|----------------------------------|---------------------------------|
| R2                        | 0.1201            | 0.1403                           | 0.0956                          |
| <b>Temperature</b>        |                   |                                  |                                 |
| coef                      | -0.0158           | -0.01988                         | -.01092                         |
| 95%CI                     | [-0.0246,-0.0071] | [-0.0300,-0.0097]                | [-0.0265,0.0047]                |
| std.err                   | 0.0043            | 0.0049                           | 0.0074                          |
| t-stat                    | -3.65             | -4.07                            | -1.47                           |
| p-value                   | 0.0007            | 0.0005                           | 0.159                           |
| <b>Relative Humidity</b>  |                   |                                  |                                 |
| coef                      | -0.0050           | -0.0080                          | -0.0014                         |
| 95%CI                     | [-0.0104,0.0004]  | [-0.0151,-0.0010]                | [-0.0026,0.0002]                |
| std.err                   | 0.0027            | 0.0034                           | 0.0006                          |
| t-stat                    | -1.88             | -2.37                            | -2.46                           |
| p-value                   | 0.067             | 0.027                            | 0.024                           |
| <b>Population Density</b> |                   |                                  |                                 |
| coef                      | 4.56e-06          | 7.77e-06                         | 6.89e-07                        |
| 95%CI                     | [-1e-5,2e-2]      | [-2.53e-5,4.08e-5]               | [-1.10e-6,2.48e-6]              |
| std.err                   | 8.34e-06          | 1.59e-05                         | 8.53e-07                        |
| t-stat                    | 0.55              | 0.49                             | 0.81                            |
| p-value                   | 0.587             | 0.631                            | 0.430                           |
| <b>Percentage over 65</b> |                   |                                  |                                 |
| coef                      | -0.948            | -1.1645                          | -0.6851                         |
| 95%CI                     | [-1.3747,-0.5205] | [-1.8362,-0.4927]                | [-1.0610,-0.3092]               |

|                                                             | <b>Overall</b>    | <b>Before Lockdown (April 7)</b> | <b>After Lockdown (April 7)</b> |
|-------------------------------------------------------------|-------------------|----------------------------------|---------------------------------|
| std.err                                                     | 0.2115            | 0.3239                           | 0.1789                          |
| t-stat                                                      | -4.48             | -3.60                            | -3.83                           |
| p-value                                                     | 6e-5              | 0.002                            | 0.001                           |
| <b>Gini</b>                                                 |                   |                                  |                                 |
| coef                                                        | -1.8813           | -1.9719                          | -1.7717                         |
| 95%CI                                                       | [-3.5537,-0.2090] | [-4.5293,0.5855]                 | [-2.5073,-1.0360]               |
| std.err                                                     | 0.8281            | 1.2331                           | 0.3502                          |
| t-stat                                                      | -2.27             | -1.60                            | -5.06                           |
| p-value                                                     | 0.028             | 0.124                            | 8e-5                            |
| <b>Socio-economic factor</b>                                |                   |                                  |                                 |
| coef                                                        | 0.0891            | 0.1321                           | 0.0371                          |
| 95%CI                                                       | [0.0372,0.1411]   | [0.0835,0.1807]                  | [-0.0048,0.0790]                |
| std.err                                                     | 0.0257            | 0.02343                          | 0.0200                          |
| t-stat                                                      | 3.47              | 5.64                             | 1.86                            |
| p-value                                                     | 0.001             | 1e-05                            | 0.079                           |
| <b>No. of ICU beds per capita</b>                           |                   |                                  |                                 |
| coef                                                        | -0.0096           | -0.0084                          | -0.0111                         |
| 95%CI                                                       | [-0.0235,0.0043]  | [-0.0301,0.0133]                 | [-0.0172,-0.0050]               |
| std.err                                                     | 0.0069            | 0.0104                           | 0.0029                          |
| t-stat                                                      | -1.40             | -0.80                            | -3.83                           |
| p-value                                                     | 0.169             | 0.430                            | 0.001                           |
| <b>Fraction of maximum moving distance over normal time</b> |                   |                                  |                                 |
| coef                                                        | 0.0041            | 0.0031                           | 0.0054                          |
| 95%CI                                                       | [0.0016,0.0066]   | [-0.0004,0.0067]                 | [0.0043,0.0065]                 |
| std.err                                                     | 0.0012            | 0.0017                           | 0.0005                          |
| t-stat                                                      | 3.35              | 1.82                             | 10.25                           |
| p-value                                                     | 0.002             | 0.082                            | 0                               |
| <b>Home-stay minutes</b>                                    |                   |                                  |                                 |
| coef                                                        | 0.0003            | 0.0007                           | -0.0002                         |

|                           | <b>Overall</b>   | <b>Before Lockdown (April 7)</b> | <b>After Lockdown (April 7)</b> |
|---------------------------|------------------|----------------------------------|---------------------------------|
| 95%CI                     | [-0.0002,0.0007] | [0.0004,0.0010]                  | [-0.0004,-3e-05]                |
| std.err                   | 0.0002           | 0.0002                           | 9e-5                            |
| t-stat                    | 1.33             | 4.73                             | -2.42                           |
| p-value                   | 0.191            | 0.0001                           | 0.026                           |
| <b>Latitude</b>           |                  |                                  |                                 |
| coef                      | -0.0182          | -0.0348                          | 0.0018                          |
| 95%CI                     | [-0.0371,0.0007] | [-0.0510,-0.0185]                | [-0.0188,0.0225]                |
| std.err                   | 0.0094           | 0.0078                           | 0.0098                          |
| t-stat                    | -1.95            | -4.43                            | 0.19                            |
| p-value                   | 0.058            | 0.0002                           | 0.854                           |
| <b>Longitude</b>          |                  |                                  |                                 |
| coef                      | 0.0069           | 0.0103                           | 0.0029                          |
| 95%CI                     | [0.0033,0.0106]  | [0.0082,0.0124]                  | [0.0008,0.0050]                 |
| std.err                   | 0.0018           | 0.0010                           | 0.0010                          |
| t-stat                    | 3.82             | 10.13                            | 2.85                            |
| p-value                   | 0.0005           | 0                                | 0.011                           |
| <b>Stay-at-home order</b> |                  |                                  |                                 |
| coef                      | 0.0199           | 0.0939                           | -0.0695                         |
| 95%CI                     | [-0.0651,0.1049] | [0.0199,0.1678]                  | [-0.13026,-0.088]               |
| std.err                   | 0.0421           | 0.0356                           | 0.0289                          |
| t-stat                    | 0.47             | 2.63                             | -2.40                           |
| p-value                   | 0.638            | 0.015                            | 0.027                           |
| <b>const</b>              |                  |                                  |                                 |
| coef                      | 1.7395           | 2.1976                           | 1.1850                          |
| 95%CI                     | [1.1800,2.2989]  | [1.6645,2.7306]                  | [1.1695,1.2005]                 |
| std.err                   | 0.2770           | 0.2570                           | 0.0074                          |
| t-stat                    | 6.28             | 8.55                             | 160.27                          |
| p-value                   | 0                | 0                                | 0                               |
