# Supplementary material for: Impact of temperature and relative humidity on the transmission of COVID-19: a modelling study in China and the United States
Source: PubMed Central journal article supplement — BMJ Open. 2021 Feb 17;11(2):e043863. doi: 10.1136/bmjopen-2020-043863 (PMC7893211; doi:10.1136/bmjopen-2020-043863), 2021-02-17
Supplement: bmjopen-2020-043863supp010.pdf [file bmjopen-2020-043863supp010.pdf]

**Table S10: Relationship between Temperature, Relative Humidity, and *R* Value: Check with spatial random effect of Chinese cities.**

Spatial random effects are introduced in first step of Fama-Macbeth regression to account for spatial correlation. The neighborhood structure is calculated from the Earth distances between cities.

|                           | Overall             | Before Lockdown (Jan 24) | After Lockdown (Jan 24) |
|---------------------------|---------------------|--------------------------|-------------------------|
| <b>Temperature</b>        |                     |                          |                         |
| coef                      | -0.0212             | -0.0269                  | -0.0196                 |
| 95%CI                     | [-0.0361, -0.0063]  | [-0.0429, -0.0108]       | [-0.0377, -0.0016]      |
| std.err                   | 0.0072              | 0.0058                   | 0.0085                  |
| t-stat                    | -2.96               | -4.65                    | -2.30                   |
| p-value                   | 0.007               | 0.010                    | 0.034                   |
| <b>Relative Humidity</b>  |                     |                          |                         |
| coef                      | -0.0045             | -0.0074                  | -0.0037                 |
| 95%CI                     | [-0.0090, -0.00003] | [-0.0103, -0.0044]       | [-0.0091, 0.0017]       |
| std.err                   | 0.0022              | 0.0011                   | 0.0026                  |
| t-stat                    | -2.09               | -6.90                    | -1.46                   |
| p-value                   | 0.049               | 0.002                    | 0.162                   |
| <b>Population Density</b> |                     |                          |                         |
| coef                      | 0.0257              | 0.1059                   | 0.0034                  |
| 95%CI                     | [-0.0197, 0.0711]   | [0.0208, 0.1911]         | [-0.0200, 0.0268]       |
| std.err                   | 0.0219              | 0.0307                   | 0.0111                  |
| t-stat                    | 1.17                | 3.45                     | 0.31                    |
| p-value                   | 0.253               | 0.026                    | 0.764                   |
| <b>Percentage over 65</b> |                     |                          |                         |
| coef                      | 0.0783              | 0.2110                   | 0.0415                  |
| 95%CI                     | [-1.5748, 1.7315]   | [-1.1675, 1.5894]        | [-2.0603, 2.1432]       |
| std.err                   | 0.7971              | 0.4965                   | 0.9962                  |
| t-stat                    | 0.10                | 0.42                     | 0.04                    |

|                                     | Overall             | Before Lockdown (Jan 24) | After Lockdown (Jan 24) |
|-------------------------------------|---------------------|--------------------------|-------------------------|
| p-value                             | 0.923               | 0.693                    | 0.967                   |
| <b>GDP per capita</b>               |                     |                          |                         |
| coef                                | -0.0022             | -0.0155                  | 0.0015                  |
| 95%CI                               | [-0.0203, 0.0159]   | [-0.0262, -0.0048]       | [-0.0187, 0.0218]       |
| std.err                             | 0.0087              | 0.0038                   | 0.0096                  |
| t-stat                              | -0.25               | -4.04                    | 0.16                    |
| p-value                             | 0.805               | 0.016                    | 0.876                   |
| <b>No. of doctors</b>               |                     |                          |                         |
| coef                                | -0.0056             | -0.0101                  | -0.0044                 |
| 95%CI                               | [-0.0083, -0.0030]  | [-0.0163, -0.0039]       | [-0.0059, -0.0029]      |
| std.err                             | 0.0013              | 0.0022                   | 0.0007                  |
| t-stat                              | -4.40               | -4.52                    | -6.10                   |
| p-value                             | 0.0003              | 0.011                    | 0.0002                  |
| <b>Drop of BMI</b>                  |                     |                          |                         |
| coef                                | 0.2327              | -0.3903                  | 0.4057                  |
| 95%CI                               | [-0.3638, 0.8291]   | [-0.6699, -0.1106]       | [-0.2111, 1.0225]       |
| std.err                             | 0.2876              | 0.1007                   | 0.2924                  |
| t-stat                              | 0.81                | -3.87                    | 1.39                    |
| p-value                             | 0.427               | 0.018                    | 0.183                   |
| <b>Inflow population from Wuhan</b> |                     |                          |                         |
| coef                                | -0.0028             | -0.0001                  | -0.0035                 |
| 95%CI                               | [-0.0055, -0.00004] | [-0.0011, 0.0008]        | [-0.0063, -0.0007]      |
| std.err                             | 0.0013              | 0.0003                   | 0.0013                  |
| t-stat                              | -2.11               | -0.43                    | -2.62                   |
| p-value                             | 0.047               | 0.688                    | 0.018                   |
| <b>Latitude</b>                     |                     |                          |                         |
| coef                                | 0.0063              | 0.0076                   | 0.0059                  |
| 95%CI                               | [-0.0161, 0.0286]   | [-0.0191, 0.0343]        | [-0.0221, 0.0339]       |
| std.err                             | 0.0108              | 0.0096                   | 0.0133                  |

|                  | <b>Overall</b>     | <b>Before Lockdown (Jan 24)</b> | <b>After Lockdown (Jan 24)</b> |
|------------------|--------------------|---------------------------------|--------------------------------|
| t-stat           | 0.58               | 0.79                            | 0.44                           |
| p-value          | 0.566              | 0.472                           | 0.662                          |
| <b>Longitude</b> |                    |                                 |                                |
| coef             | -0.0100            | -0.0258                         | -0.0056                        |
| 95%CI            | [-0.0195, -0.0006] | [-0.0514, -0.0003]              | [-0.0141, 0.0028]              |
| std.err          | 0.0046             | 0.0092                          | 0.0040                         |
| t-stat           | -2.20              | -2.81                           | -1.40                          |
| p-value          | 0.039              | 0.048                           | 0.178                          |
| <b>const</b>     |                    |                                 |                                |
| coef             | 1.1002             | 2.1148                          | 0.8183                         |
| 95%CI            | [0.5229, 1.6774]   | [1.5587, 2.6710]                | [0.5551, 1.0815]               |
| std.err          | 0.2784             | 0.2003                          | 0.1247                         |
| t-stat           | 3.95               | 10.56                           | 6.56                           |
| p-value          | 0.001              | 0                               | 0.0002                         |
