# Supplementary material for: Impact of temperature and relative humidity on the transmission of COVID-19: a modelling study in China and the United States
Source: PubMed Central journal article supplement — BMJ Open. 2021 Feb 17;11(2):e043863. doi: 10.1136/bmjopen-2020-043863 (PMC7893211; doi:10.1136/bmjopen-2020-043863), 2021-02-17
Supplement: bmjopen-2020-043863supp011.pdf [file bmjopen-2020-043863supp011.pdf]

**Table S11: Relationship between Temperature, Relative Humidity, and *R* Value: Check with spatial random effect of the U.S. counties.**

Spatial random effects are introduced in first step of Fama-Macbeth regression to account for spatial correlation. The neighborhood structure is calculated from the Earth distances between counties.

|                           | <b>Overall</b>      | <b>Before Lockdown (April 7)</b> | <b>After Lockdown (April 7)</b> |
|---------------------------|---------------------|----------------------------------|---------------------------------|
| <b>Temperature</b>        |                     |                                  |                                 |
| coef                      | -0.0136             | -0.0135                          | -0.0136                         |
| 95%CI                     | [-0.0215, -0.0057]  | [-0.0236, -0.0034]               | [-0.0280, 0.0007]               |
| std.err                   | 0.0039              | 0.0049                           | 0.0068                          |
| t-stat                    | -3.46               | -2.78                            | -2.00                           |
| p-value                   | 0.001               | 0.011                            | 0.061                           |
| <b>Relative Humidity</b>  |                     |                                  |                                 |
| coef                      | -0.0052             | -0.0072                          | -0.0029                         |
| 95%CI                     | [-0.0095, -0.0010]  | [-0.0130, -0.0014]               | [-0.0042, -0.0016]              |
| std.err                   | 0.0021              | 0.0028                           | 0.0006                          |
| t-stat                    | -2.51               | -2.57                            | -4.59                           |
| p-value                   | 0.016               | 0.017                            | 0.0003                          |
| <b>Population Density</b> |                     |                                  |                                 |
| coef                      | 3.26e-8             | 2.98e-6                          | -3.54e-6                        |
| 95%CI                     | [-0.00002, 0.00002] | [-0.00003, 0.00004]              | [-5.13e-6, -1.95e-6]            |
| std.err                   | 8.58e-6             | 0.00002                          | 7.57e-7                         |
| t-stat                    | 0.00                | 0.18                             | -4.67                           |
| p-value                   | 0.997               | 0.858                            | 0.0002                          |
| <b>Percentage over 65</b> |                     |                                  |                                 |
| coef                      | -0.7988             | -1.0894                          | -0.4471                         |
| 95%CI                     | [-1.4330, -0.1647]  | [-2.0771, -0.1017]               | [-0.7620, -0.1322]              |
| std.err                   | 0.3140              | 0.4763                           | 0.1499                          |
| t-stat                    | -2.54               | -2.29                            | -2.98                           |

|                                                             | <b>Overall</b>     | <b>Before Lockdown (April 7)</b> | <b>After Lockdown (April 7)</b> |
|-------------------------------------------------------------|--------------------|----------------------------------|---------------------------------|
| p-value                                                     | 0.015              | 0.032                            | 0.008                           |
| <b>Gini</b>                                                 |                    |                                  |                                 |
| coef                                                        | -1.8186            | -2.2916                          | -1.2460                         |
| 95%CI                                                       | [-3.3837, -0.2534] | [-4.5288, -0.0543]               | [-2.1425, -0.3495]              |
| std.err                                                     | 0.7750             | 1.0788                           | 0.4267                          |
| t-stat                                                      | -2.35              | -2.12                            | -2.92                           |
| p-value                                                     | 0.024              | 0.045                            | 0.009                           |
| <b>Socio-economic factor</b>                                |                    |                                  |                                 |
| coef                                                        | 0.1131             | 0.1480                           | 0.0708                          |
| 95%CI                                                       | [0.0682, 0.1580]   | [0.0903, 0.2056]                 | [0.0451, 0.0965]                |
| std.err                                                     | 0.0222             | 0.0278                           | 0.0122                          |
| t-stat                                                      | 5.08               | 5.32                             | 5.78                            |
| p-value                                                     | 0.0002             | 0.0002                           | 0.0002                          |
| <b>No. of ICU beds per capita</b>                           |                    |                                  |                                 |
| coef                                                        | -0.0092            | -0.0127                          | -0.0050                         |
| 95%CI                                                       | [-0.0238, 0.0054]  | [-0.0359, 0.0105]                | [-0.0101, 0.0002]               |
| std.err                                                     | 0.0072             | 0.0112                           | 0.0025                          |
| t-stat                                                      | -1.27              | -1.14                            | -2.01                           |
| p-value                                                     | 0.210              | 0.267                            | 0.059                           |
| <b>Fraction of maximum moving distance over normal time</b> |                    |                                  |                                 |
| coef                                                        | 0.0040             | 0.0024                           | 0.0059                          |
| 95%CI                                                       | [0.0012, 0.0068]   | [-0.0014, 0.0063]                | [0.0054, 0.0064]                |
| std.err                                                     | 0.0014             | 0.0019                           | 0.0002                          |
| t-stat                                                      | 2.93               | 1.30                             | 25.03                           |
| p-value                                                     | 0.005              | 0.207                            | 0                               |
| <b>Home-stay minutes</b>                                    |                    |                                  |                                 |
| coef                                                        | 0.0003             | 0.0005                           | 0.00002                         |
| 95%CI                                                       | [0.00002, 0.0006]  | [0.0001, 0.0009]                 | [-0.0002, 0.0002]               |
| std.err                                                     | 0.0001             | 0.0002                           | 0.0001                          |

|                  | <b>Overall</b>    | <b>Before Lockdown (April 7)</b> | <b>After Lockdown (April 7)</b> |
|------------------|-------------------|----------------------------------|---------------------------------|
| t-stat           | 2.15              | 2.81                             | 0.19                            |
| p-value          | 0.038             | 0.010                            | 0.851                           |
| <b>Latitude</b>  |                   |                                  |                                 |
| coef             | -0.0152           | -0.0278                          | -0.00004                        |
| 95%CI            | [-0.0308, 0.0003] | [-0.0423, -0.0133]               | [-0.0208, 0.0207]               |
| std.err          | 0.0077            | 0.0070                           | 0.0099                          |
| t-stat           | -1.98             | -3.97                            | -0.00                           |
| p-value          | 0.055             | 0.001                            | 0.997                           |
| <b>Longitude</b> |                   |                                  |                                 |
| coef             | 0.0060            | 0.0084                           | 0.0032                          |
| 95%CI            | [0.0033, 0.0088]  | [0.0064, 0.0104]                 | [0.0015, 0.0049]                |
| std.err          | 0.0014            | 0.0010                           | 0.0008                          |
| t-stat           | 4.45              | 8.78                             | 3.86                            |
| p-value          | 0.0003            | 0                                | 0.001                           |
| <b>const</b>     |                   |                                  |                                 |
| coef             | 1.7377            | 2.2018                           | 1.1759                          |
| 95%CI            | [1.1715, 2.3039]  | [1.6623, 2.7413]                 | [1.1594, 1.1923]                |
| std.err          | 0.2803            | 0.2601                           | 0.0078                          |
| t-stat           | 6.20              | 8.46                             | 150.10                          |
| p-value          | 0                 | 0                                | 0                               |
