# Supplementary material for: Impact of temperature and relative humidity on the transmission of COVID-19: a modelling study in China and the United States
Source: PubMed Central journal article supplement — BMJ Open. 2021 Feb 17;11(2):e043863. doi: 10.1136/bmjopen-2020-043863 (PMC7893211; doi:10.1136/bmjopen-2020-043863), 2021-02-17
Supplement: bmjopen-2020-043863supp012.pdf [file bmjopen-2020-043863supp012.pdf]

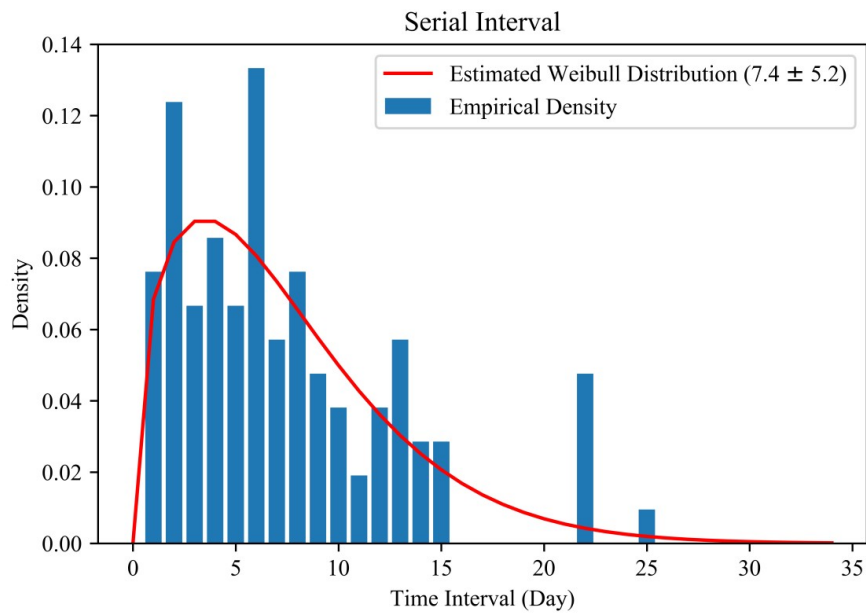

**Fig. S1. Estimation of the serial interval with the Weibull distribution**

Bars denote the probability of occurrences in specified bins, and the red curve is the density function of the estimated Weibull distribution.
